# Supplementary material for: De Novo Transcriptome Analysis and Detection of Antimicrobial Peptides of the American Cockroach Periplaneta americana (Linnaeus)
Source: PLoS One. 2016 May 11;11(5):e0155304. doi: 10.1371/journal.pone.0155304 (PMC4864078; doi:10.1371/journal.pone.0155304)
Supplement: S2 Table — (XLSX) [file pone.0155304.s004.xlsx]

## Sheet: Known AMPs
Sequence Annotation				CAMP Database Informations											AMP Prediction				DGE		Allergen Prediction
Sequence ID	Description	Species	Blast (Evalue)	CAMP ID	Similarity	Evalue	Program	AMP Name	Peptide Sequence	Sequence Length	Pubmed ID	Activity	Charge	Evdience	Class	Discriminant Score	Class	SVM Score	log2(FC)	q_value	Prediction	SVM-score	Allergen-probabilty
ISGCock_Contig08_4679	S. Lysosomal-trafficking regulator	Bos taurus (Bovine)	2e-97	CAMPSQ3523	100	0	PatMatch	EP2	AMVSS	5		Antimicrobial		Experimentally Validated	AMP	-4.288	AMP	1	0.509407	0.78194	non-allergen	-0.922217	0.00860376
ISGCock_Contig01_1311	S. Histone-lysine N-methyltransferase SETD2		5.7e-111	CAMPSQ2991	100	0	PatMatch	Anionic peptide SAAP	DDDDDD	6	8552650	Antibacterial	Gram+ve, Gram-ve	Experimentally Validated	AMP	-31.013	AMP	1	0.129697	0.950852	non-allergen	-0.950143	0.0073912
ISGCock_Contig08_3466	S. Hemolymph lipopolysaccharide-binding protein precursor	Periplaneta americana (American cockroach)	3.1e-16	CAMPSQ5047	100	0	PatMatch	Chain A, Cyclic Pentapeptide Which Inhibits Hantavirus.	CPFVC	5	17441904	Antiviral		Experimentally Validated	AMP	-1.724	AMP	1	-0.832286	0.57218	non-allergen	-0.937131	0.00793353
ISGCock_Contig06_0027	S. CUE domain-containing protein 1	Homo sapiens (Human)	4e-35	CAMPSQ2991	100	0	PatMatch	Anionic peptide SAAP	DDDDDD	6	8552650	Antibacterial	Gram+ve, Gram-ve	Experimentally Validated	AMP	-0.79	AMP	1	0.167244	0.936168	non-allergen	-0.932837	0.008121
ISGCock_Contig04_1279	P. ZMYND11 protein	Homo sapiens (Human)	2.9e-55	CAMPSQ2991	100	0	PatMatch	Anionic peptide SAAP	DDDDDD	6	8552650	Antibacterial	Gram+ve, Gram-ve	Experimentally Validated	AMP	-7.13	AMP	1	-0.711285	0.643505	non-allergen	-0.923882	0.00852624
ISGCock_Contig04_4593	P. weakly similar to ZINC FINGE PROTEIN 45	Homo sapiens (Human)	9.2e-27	CAMPSQ2991	100	0	PatMatch	Anionic peptide SAAP	DDDDDD	6	8552650	Antibacterial	Gram+ve, Gram-ve	Experimentally Validated	AMP	-5.504	AMP	1	-0.567471	0.757705	non-allergen	-1.0152	0.00518509
ISGCock_Contig01_0978	P. Sumo ligase	Culex quinquefasciatus (Southern house mosquito)	1.4e-149	CAMPSQ2732	100	0	PatMatch	Antimicrobial protein 2	SPGGA	5		Antibacterial	Gram+ve, Gram-ve	Predicted	AMP	-2.642	AMP	1	0.284227	0.887787	non-allergen	-0.827505	0.0143782
ISGCock_Contig07_1346	P. Sec14l1 protein	Xenopus tropicalis (Western clawed frog) (Silurana tropicalis)	3.2e-85	CAMPSQ2991	100	0	PatMatch	Anionic peptide SAAP	DDDDDD	6	8552650	Antibacterial	Gram+ve, Gram-ve	Experimentally Validated	AMP	-2.362	AMP	1	-0.469547	0.814095	non-allergen	-0.935573	0.00800106
ISGCock_Contig04_3438	P. RE03018p	Drosophila melanogaster (Fruit fly)	1.8e-15	CAMPSQ2991	100	0	PatMatch	Anionic peptide SAAP	DDDDDD	6	8552650	Antibacterial	Gram+ve, Gram-ve	Experimentally Validated	AMP	-2.238	AMP	1	1.36351	0.287992	non-allergen	-0.910541	0.00916743
ISGCock_Contig03_1625	P. Putative uncharacterized protein	Aedes aegypti (Yellowfever mosquito)	1.2e-172	CAMPSQ2991	100	0	PatMatch	Anionic peptide SAAP	DDDDDD	6	8552650	Antibacterial	Gram+ve, Gram-ve	Experimentally Validated	AMP	-13.776	AMP	1	-0.15126	0.940236	non-allergen	-0.962995	0.00689171
ISGCock_Contig13_0162	P. Putative uncharacterized protein	Gallus gallus (Chicken)	1.2e-36	CAMPSQ2991	100	0	PatMatch	Anionic peptide SAAP	DDDDDD	6	8552650	Antibacterial	Gram+ve, Gram-ve	Experimentally Validated	AMP	-2.991	AMP	1	0.0355943	0.991036	non-allergen	-0.930424	0.0082283
ISGCock_Contig03_1566	P. Predicted protein	Monosiga brevicollis (Choanoflagellate)	2.3e-87	CAMPSQ2991	100	0	PatMatch	Anionic peptide SAAP	DDDDDD	6	8552650	Antibacterial	Gram+ve, Gram-ve	Experimentally Validated	AMP	-13.902	AMP	1	0.0975772	0.968338	non-allergen	-0.914597	0.0089676
ISGCock_Contig08_4742	P. Organic anion transporter	Culex quinquefasciatus (Southern house mosquito)	1.9e-43	CAMPSQ3524	100	0	PatMatch	EP3	AMVGT	5		Antimicrobial		Experimentally Validated	AMP	-3.478	AMP	1	-0.0312233	0.992231	non-allergen	-0.94228	0.00771437
ISGCock_Contig04_0023	P. MFLJ00246 protein	Mus musculus (Mouse)	0	CAMPSQ3438	100	0	PatMatch	EP5-1	ACSAG	5	15253156	Antibacterial	Gram+ve, Gram-ve	Experimentally Validated	AMP	-16.565	AMP	1	0.635517	0.679671	non-allergen	-0.976674	0.00639689
ISGCock_Contig01_3113	P. LOC447949 protein	Xenopus tropicalis (Western clawed frog) (Silurana tropicalis)	0	CAMPSQ2991	100	0	PatMatch	Anionic peptide SAAP	DDDDDD	6	8552650	Antibacterial	Gram+ve, Gram-ve	Experimentally Validated	AMP	-22.385	AMP	1	0.620543	0.691922	non-allergen	-0.919134	0.00874918
ISGCock_Contig02_0568	P. JARID1A variant protein	Homo sapiens (Human)	3.4e-38	CAMPSQ2991	100	0	PatMatch	Anionic peptide SAAP	DDDDDD	6	8552650	Antibacterial	Gram+ve, Gram-ve	Experimentally Validated	AMP	-7.659	AMP	1	0.360263	0.846395	non-allergen	-0.977645	0.00636311
ISGCock_Contig03_0919	P. Histone H2A	Penaeus monodon (Penoeid shrimp)	1.7e-52	CAMPSQ87	100	0	PatMatch	Histone H2A	AERVGAGAPVYL	12	12164782	Antibacterial,Antifungal	Gram+ve, Gram-ve	Experimentally Validated	AMP	-3.914	AMP	1	0.146252	0.944727	non-allergen	-1.01877	0.00508502
ISGCock_Contig04_0367	P. Histone H2A	Penaeus monodon (Penoeid shrimp)	3.7e-52	CAMPSQ87	100	0	PatMatch	Histone H2A	AERVGAGAPVYL	12	12164782	Antibacterial,Antifungal	Gram+ve, Gram-ve	Experimentally Validated	AMP	-2.78	AMP	1	0.312459	0.892177	non-allergen	-1.01145	0.00529217
ISGCock_Contig01_2737	P. Chemosensory protein 5	Tribolium castaneum (Red flour beetle)	4e-23	CAMPSQ2991	100	0	PatMatch	Anionic peptide SAAP	DDDDDD	6	8552650	Antibacterial	Gram+ve, Gram-ve	Experimentally Validated	Non-AMP	0.002	AMP	0.686	-0.783007	0.587508	non-allergen	-1.14287	0.00258137
ISGCock_Contig13_2533	P. CBR-PMT-2 protein	Caenorhabditis briggsae	1.5e-67	CAMPSQ2732	100	0	PatMatch	Antimicrobial protein 2	SPGGA	5		Antibacterial	Gram+ve, Gram-ve	Predicted	AMP	-0.464	AMP	1	0.95251	0.587426	non-allergen	-0.989382	0.00596886
ISGCock_Contig01_0609	P. Blackjack	Schistocerca americana (American grasshopper)	2.9e-23	CAMPSQ2991	100	0	PatMatch	Anionic peptide SAAP	DDDDDD	6	8552650	Antibacterial	Gram+ve, Gram-ve	Experimentally Validated	AMP	-11.449	AMP	1	0.863331	0.591579	non-allergen	-0.961519	0.00694732
ISGCock_Contig05_0629	P. AGAP009167-PA	Anopheles gambiae (African malaria mosquito)	1.9e-116	CAMPSQ2991	100	0	PatMatch	Anionic peptide SAAP	DDDDDD	6	8552650	Antibacterial	Gram+ve, Gram-ve	Experimentally Validated	AMP	-10.028	AMP	1	0.038347	0.990663	non-allergen	-0.971134	0.00659288
ISGCock_Contig04_0983	P. AGAP007006-PA	Anopheles gambiae (African malaria mosquito)	8.5e-133	CAMPSQ5047	100	0	PatMatch	Chain A, Cyclic Pentapeptide Which Inhibits Hantavirus.	CPFVC	5	17441904	Antiviral		Experimentally Validated	AMP	-4.77	AMP	1	-0.491794	0.7733	non-allergen	-0.937009	0.00793878
ISGCock_Contig04_1013	P. AGAP002557-PA	Anopheles gambiae (African malaria mosquito)	2.4e-26	CAMPSQ3524	100	0	PatMatch	EP3	AMVGT	5		Antimicrobial		Experimentally Validated	Non-AMP	0.558	AMP	0.685	-0.855975	0.562625	non-allergen	-1.01601	0.00516228
ISGCock_Contig16_1016	P. 40S ribosomal protein S30, putative	Brugia malayi (Filarial nematode worm)	3.4e-29	CAMPSQ4107	100	0	PatMatch	40S ribosomal protein S30	KVHGSLARAGK	11	12147245	Antibacterial	Gram+ve	Experimentally Validated	AMP	-2.75	AMP	1	-1.78741	0.238541	non-allergen	-0.939719	0.0078226
ISGCock_Contig11_1549	P. 40S ribosomal protein S30, putative	Brugia malayi (Filarial nematode worm)	2.1e-29	CAMPSQ4107	100	0	PatMatch	40S ribosomal protein S30	KVHGSLARAGK	11	12147245	Antibacterial	Gram+ve	Experimentally Validated	AMP	-2.806	AMP	1	-0.560338	0.801937	non-allergen	-0.98377	0.00615423
ISGCock_Contig05_1495	P. Putative uncharacterized protein	Periplaneta americana (American cockroach)	NA	CAMPSQ2991	100	0	PatMatch	Anionic peptide SAAP	DDDDDD	6	8552650	Antibacterial	Gram+ve, Gram-ve	Experimentally Validated	AMP	-1.018	AMP	1	-1.97601	0.139425	non-allergen	-0.86788	0.0115557
ISGCock_Contig05_0611	P. Putative uncharacterized protein	Periplaneta americana (American cockroach)	NA	CAMPSQ2732	100	0	PatMatch	Antimicrobial protein 2	SPGGA	5		Antibacterial	Gram+ve, Gram-ve	Predicted	AMP	-15.852	AMP	1	-0.243468	0.904471	non-allergen	-0.941068	0.00776538
ISGCock_Contig03_2702	P. Putative uncharacterized protein	Periplaneta americana (American cockroach)	NA	CAMPSQ2991	100	0	PatMatch	Anionic peptide SAAP	DDDDDD	6	8552650	Antibacterial	Gram+ve, Gram-ve	Experimentally Validated	AMP	-1.536	AMP	1	-0.106215	0.964493	non-allergen	-0.97486	0.0064604
ISGCock_Contig01_0475	P. Putative uncharacterized protein	Periplaneta americana (American cockroach)	NA	CAMPSQ2991	100	0	PatMatch	Anionic peptide SAAP	DDDDDD	6	8552650	Antibacterial	Gram+ve, Gram-ve	Experimentally Validated	AMP	-1.67	AMP	0.986	-0.0697527	0.981468	non-allergen	-0.792527	0.0173654
ISGCock_Contig02_2072	P. Putative uncharacterized protein	Periplaneta americana (American cockroach)	NA	CAMPSQ2991	100	0	PatMatch	Anionic peptide SAAP	DDDDDD	6	8552650	Antibacterial	Gram+ve, Gram-ve	Experimentally Validated	AMP	-5.797	AMP	1	-0.0558753	0.986614	non-allergen	-0.861767	0.0119449
ISGCock_Contig05_0021	P. Putative uncharacterized protein	Periplaneta americana (American cockroach)	NA	CAMPSQ2991	100	0	PatMatch	Anionic peptide SAAP	DDDDDD	6	8552650	Antibacterial	Gram+ve, Gram-ve	Experimentally Validated	AMP	-6.207	AMP	1	-0.038024	0.990634	non-allergen	-0.961619	0.00694355
ISGCock_Contig13_0358	P. Putative uncharacterized protein	Periplaneta americana (American cockroach)	NA	CAMPSQ3523	100	0	PatMatch	EP2	AMVSS	5		Antimicrobial		Experimentally Validated	Non-AMP	1.113	AMP	1	-0.0307747	0.992806	non-allergen	-0.966577	0.00675857
ISGCock_Contig07_3115	P. Putative uncharacterized protein	Periplaneta americana (American cockroach)	NA	CAMPSQ2732	100	0	PatMatch	Antimicrobial protein 2	SPGGA	5		Antibacterial	Gram+ve, Gram-ve	Predicted	AMP	-2.314	AMP	1	-0.00859753	1	non-allergen	-0.997312	0.00571632
ISGCock_Contig15_0244	P. Putative uncharacterized protein	Periplaneta americana (American cockroach)	NA	CAMPSQ5031	100	0	PatMatch	Chain B, Co-Complex Structure Of Ns3-4a Protease With The Optimized Inhibitory Peptide Cp5-46a-4d5e	GSVVIVGRIILSGKGGPITAYSQQTRGLLGCIITSLTGRDRNQVEGEVQVVSTATQSFLATCVNGVCWTVYHGAGSKTLAGPKGPITQMYTNVDQDLVGWQAPPGARSLTPCTCGSSDLYLVTRHADVIPVRRRGDSRGSLLSPRPVSYLKGSSGGPLLCPSGHAVGIFRAAVCTRGVAKAVDFVPVESMETTMRGSHHHHHH	203	22965230	Antiviral		Experimentally Validated	AMP	-0.495	Non-AMP	0.532	0.126361	0.97304	non-allergen	-0.893242	0.0100705
ISGCock_Contig02_1550	P. Putative uncharacterized protein	Periplaneta americana (American cockroach)	NA	CAMPSQ2991	100	0	PatMatch	Anionic peptide SAAP	DDDDDD	6	8552650	Antibacterial	Gram+ve, Gram-ve	Experimentally Validated	AMP	-3.426	Non-AMP	0.786	0.475608	0.774335	non-allergen	-0.955061	0.00719598
ISGCock_Contig07_4671	P. Putative uncharacterized protein	Periplaneta americana (American cockroach)	NA	CAMPSQ2991	100	0	PatMatch	Anionic peptide SAAP	DDDDDD	6	8552650	Antibacterial	Gram+ve, Gram-ve	Experimentally Validated	AMP	-2.652	AMP	0.999	0.840609	0.703852	non-allergen	-0.903789	0.00950997
ISGCock_Contig07_2541	P. Putative uncharacterized protein	Periplaneta americana (American cockroach)	NA	CAMPSQ2991	100	0	PatMatch	Anionic peptide SAAP	DDDDDD	6	8552650	Antibacterial	Gram+ve, Gram-ve	Experimentally Validated	Non-AMP	-0.233	AMP	0.955	1.04434	0.427462	non-allergen	-1.06542	0.0039418
ISGCock_Contig06_4234	P. Putative uncharacterized protein	Periplaneta americana (American cockroach)	NA	CAMPSQ2991	100	0	PatMatch	Anionic peptide SAAP	DDDDDD	6	8552650	Antibacterial	Gram+ve, Gram-ve	Experimentally Validated	Non-AMP	1.125	AMP	0.516	4.46329	0.00570754	non-allergen	-1.09081	0.00343126
ISGCock_Contig06_0062	P. Putative uncharacterized protein	Periplaneta americana (American cockroach)	NA	CAMPSQ2732	100	0	PatMatch	Antimicrobial protein 2	SPGGA	5		Antibacterial	Gram+ve, Gram-ve	Predicted	AMP	-0.447	Non-AMP	0.928	inf	1	non-allergen	-0.983924	0.00614908
ISGCock_Contig06_3586	P. Putative uncharacterized protein	Periplaneta americana (American cockroach)	NA	CAMPSQ2991	100	0	PatMatch	Anionic peptide SAAP	DDDDDD	6	8552650	Antibacterial	Gram+ve, Gram-ve	Experimentally Validated	Non-AMP	0.475	AMP	1	inf	0.122189	non-allergen	-0.91985	0.00871522
ISGCock_Contig18_0537	P. Putative uncharacterized protein	Periplaneta americana (American cockroach)	NA	CAMPSQ3438	100	0	PatMatch	EP5-1	ACSAG	5	15253156	Antibacterial	Gram+ve, Gram-ve	Experimentally Validated	AMP	-0.389	Non-AMP	0.572	# -inf	1	non-allergen	-1.01691	0.0051368
ISGCock_Contig12_0322	S. ATP-dependent DNA helicase Q1	Rattus norvegicus (Rat)	3.2e-53	CAMPSQ3576	100	2.2	BLASTP	Fa-AMP2	AQCGAQGGGATCPGGLCCSQWGWCGSTPKYCGAGCQSNCR	40	12951494	Antibacterial	Gram+ve, Gram-ve	Experimentally Validated	AMP	-1.002	AMP	1	0.0758655	0.985598	non-allergen	-0.950341	0.00738327
ISGCock_Contig07_2686	P. Ubiquitin, putative	Brugia malayi (Filarial nematode worm)	2.3e-37	CAMPSQ3935	100	1e-06	BLASTP	cgUbiquitin	MQIFVKTLTGKTITLEVEPSDTIENVKAKIQDKEGIPPDQQRLIFAGKQLEDGRTLSDYNIQKESTLHLVLRLR	74	22858580	Antibacterial	Gram+ve, Gram-ve	Experimentally Validated	AMP	-2.774	AMP	0.998	-0.653732	0.746101	non-allergen	-0.99579	0.00576397
ISGCock_Contig06_0310	P. Sugar transporter	Aedes aegypti (Yellowfever mosquito)	1.9e-69	CAMPSQ988	100	1.6	BLASTP	Ostricacin-1	LFCRKGTCHFGGCPAHLVKVGSCFGFRACCKWPWDV	36	16459058	Antibacterial	Gram+ve, Gram-ve	Experimentally Validated	AMP	-1.474	AMP	1	-0.976931	0.533947	non-allergen	-0.99662	0.00573793
ISGCock_Contig06_0457	P. RE06389p (CG2310-PA, isoform A)	Drosophila melanogaster (Fruit fly)	1.1e-35	CAMPSQ2208	100	2.8	BLASTP	Hepcidin antimicrobial peptide	MALNTNIRAACLLLLLLASLTSGSVLPHQTRQLADLQTQDAAGMAGAAAGLMPGLHQLRRRDTHFPICTLCCGCCNKQKCGWCCKT	86		Antimicrobial		Predicted	AMP	-3.602	AMP	1	-0.79191	0.590329	non-allergen	-0.978382	0.00633761
ISGCock_Contig06_4147	P. Putative uncharacterized protein	Culex quinquefasciatus (Southern house mosquito)	3.8e-44	CAMPSQ3722	100	6.4	BLASTP	Sm-AMP-D1	KICERASGTWKGICIHSNDCNNQCVKWENAGSGSCHYQFPNYMCFCYFDC	50	21056078	Antimicrobial		Experimentally Validated	AMP	-2.133	AMP	1	0.233338	0.91092	non-allergen	-0.90884	0.00925254
ISGCock_Contig06_3896	P. Predicted Protein	Paramecium tetraurelia	4.8e-43	CAMPSQ3935	94.59	2e-37	BLASTP	cgUbiquitin	MQIFVKTLTGKTITLEVEPSDTIENVKAKIQDKEGIPPDQQRLIFAGKQLEDGRTLSDYNIQKESTLHLVLRLR	74	22858580	Antibacterial	Gram+ve, Gram-ve	Experimentally Validated	AMP	-1.982	AMP	0.998	-0.0590036	0.988831	non-allergen	-0.990878	0.00592039
ISGCock_Contig07_2868	P. Predicted protein	Nematostella vectensis (Starlet sea anemone)	1.1e-35	CAMPSQ1474	100	2.5	BLASTP	Hypothetical protein Sente 27112	HPDVVSYFMIHHDWKFDFFHYEKDGDIKGSYFLCNGKQIGIMARRSYPLSSDEVLIPFSPHARCFFPDKTNKLSIINKQNIINATWKIARKKQNCIIKESFSPKFEKTRRNEIQRFIRNGGEIKCISQLSDKEISSSYISLFHSRFGGTLPCYEYDNLLMFISHLRELMFGHVLFWDNKPCAIDIVLKSESSCNVYYDVPNGAVLNDENCMKLSPGSVLMWLN	223		Antimicrobial		Predicted	AMP	-1.828	AMP	1	0.236872	0.929734	non-allergen	-0.951431	0.00733957
ISGCock_Contig01_0235	P. Polyubiquitin, putative	Brugia malayi (Filarial nematode worm)	1e-80	CAMPSQ3935	100	4e-39	BLASTP	cgUbiquitin	MQIFVKTLTGKTITLEVEPSDTIENVKAKIQDKEGIPPDQQRLIFAGKQLEDGRTLSDYNIQKESTLHLVLRLR	74	22858580	Antibacterial	Gram+ve, Gram-ve	Experimentally Validated	AMP	-2.081	AMP	1	0.400665	0.832689	non-allergen	-1.00039	0.00562113
ISGCock_Contig12_1625	P. P125 protein	Bovine viral diarrhea virus (BVDV) (Mucosal disease virus)	3.4e-49	CAMPSQ3935	100	2e-25	BLASTP	cgUbiquitin	MQIFVKTLTGKTITLEVEPSDTIENVKAKIQDKEGIPPDQQRLIFAGKQLEDGRTLSDYNIQKESTLHLVLRLR	74	22858580	Antibacterial	Gram+ve, Gram-ve	Experimentally Validated	AMP	-0.721	AMP	0.844	-0.647683	0.809204	non-allergen	-1.00597	0.00545283
ISGCock_Contig09_0848	P. P125 protein	Bovine viral diarrhea virus (BVDV) (Mucosal disease virus)	7.5e-75	CAMPSQ3935	98.65	2e-38	BLASTP	cgUbiquitin	MQIFVKTLTGKTITLEVEPSDTIENVKAKIQDKEGIPPDQQRLIFAGKQLEDGRTLSDYNIQKESTLHLVLRLR	74	22858580	Antibacterial	Gram+ve, Gram-ve	Experimentally Validated	AMP	-1.336	AMP	1	0.10595	0.973075	non-allergen	-0.998917	0.00566651
ISGCock_Contig01_4674	P. Histone H2B	Caenorhabditis briggsae	1.5e-44	CAMPSQ4167	96.7	2e-49	BLASTP	Histone H2B	PEPAKSAPAAKKGSKKAVSKVQKKDGKKRRKSRKESYAIYVYKVLKQVHPDTGISSKAMSIMNSFVNDIFERIAGEASRLAHYNKRSTITSREIQTAVRLLLPGELAKHAVSEGTKAVTKYTSAK	125	14651982	Antibacterial	Gram-ve	Experimentally Validated	AMP	-4.558	AMP	1	-3.25239	0.00135969	non-allergen	-1.03541	0.00464356
ISGCock_Contig03_0919	P. Histone H2A	Penaeus monodon (Penoeid shrimp)	1.7e-52	CAMPSQ4123	97.94	7e-52	BLASTP	Histone H2A	SGRGKGGKVKGKSKSRSSRAGLQFPVGRIHRLLRKGNYAERVGAGAPVYLAAVMEYLAAEVLELAGNAARDNKKTRIVPRHLQLAIRNDEELNKLLSGVTIAQGGVLPNIQAVLLPKKTEKK	122	15606770	Antibacterial	Gram+ve	Experimentally Validated	AMP	-3.914	AMP	1	0.146252	0.944727	non-allergen	-1.01877	0.00508502
ISGCock_Contig04_0367	P. Histone H2A	Penaeus monodon (Penoeid shrimp)	3.7e-52	CAMPSQ4123	99.03	7e-56	BLASTP	Histone H2A	SGRGKGGKVKGKSKSRSSRAGLQFPVGRIHRLLRKGNYAERVGAGAPVYLAAVMEYLAAEVLELAGNAARDNKKTRIVPRHLQLAIRNDEELNKLLSGVTIAQGGVLPNIQAVLLPKKTEKK	122	15606770	Antibacterial	Gram+ve	Experimentally Validated	AMP	-2.78	AMP	1	0.312459	0.892177	non-allergen	-1.01145	0.00529217
ISGCock_Contig01_0792	P. Drs protein	Drosophila simulans (Fruit fly)	4.1e-19	CAMPSQ68	93.18	1e-20	BLASTP	Drosomycin	DCLSGRYKGPCAVWDNETCRRVCKEEGRSSGHCSPSLKCWCEGC	44	7806546	Antifungal		Experimentally Validated	AMP	-1.295	AMP	0.912	1.10486	0.384939	non-allergen	-0.875661	0.0110783
ISGCock_Contig09_3877	P. Cell division protein, penicillin-binding protein	unidentified eubacterium SCB49	7.2e-27	CAMPSQ1030	90	1.9	BLASTP	CA	KWKLFKKIGIGAVLKVLTTGLPALIS	26	1733777	Antibacterial	Gram+ve, Gram-ve	Experimentally Validated	AMP	-1.078	AMP	0.999	-0.822084	0.737969	non-allergen	-1.00482	0.00548713
ISGCock_Contig03_3712	P. 60S ribosomal protein L40	Aspergillus terreus (strain NIH 2624)	9.7e-31	CAMPSQ3935	100	7e-05	BLASTP	cgUbiquitin	MQIFVKTLTGKTITLEVEPSDTIENVKAKIQDKEGIPPDQQRLIFAGKQLEDGRTLSDYNIQKESTLHLVLRLR	74	22858580	Antibacterial	Gram+ve, Gram-ve	Experimentally Validated	AMP	-2.52	AMP	0.974	-1.08354	0.583923	non-allergen	-1.02486	0.00491888
ISGCock_Contig15_2271	P. 60S ribosomal protein L40	Aspergillus terreus (strain NIH 2624)	2.7e-28	CAMPSQ3935	96.3	3e-11	BLASTP	cgUbiquitin	MQIFVKTLTGKTITLEVEPSDTIENVKAKIQDKEGIPPDQQRLIFAGKQLEDGRTLSDYNIQKESTLHLVLRLR	74	22858580	Antibacterial	Gram+ve, Gram-ve	Experimentally Validated	AMP	-3.559	AMP	0.998	-0.120567	1	non-allergen	-0.959368	0.00702919
ISGCock_Contig10_1583	P. Putative uncharacterized protein	Periplaneta americana (American cockroach)	NA	CAMPSQ4206	90.91	1.6	BLASTP	Endochitinase	VSSVISSSLFEKMLLHRGFYTYDAFIAAAKSFPAFATTGSTDVRKREVAAFLAQTSHETTGGWPTAPDGPYELGSTSDYFGRGPIQISYNYNYGAAGKAIGVDLLRNPDLVTSDNTVEFKTALWFWMTPQSPKPSSHDVITGRWSPSSTDKAAGRVPGYGVLTNIIDGGVECGKGQESHVADRIGYYKDNLDCYNQKPFA	200	19224400	Antifungal		Experimentally Validated	AMP	-12.02	AMP	1	-5.35891	1.34333e-07	non-allergen	-1.02107	0.00502162
ISGCock_Contig11_3811	P. Putative uncharacterized protein	Periplaneta americana (American cockroach)	NA	CAMPSQ1524	100	1.9	BLASTP	Pseudo-hevein	EQCGRQAGGKLCPNNLCCSQYGWCGSSDDYCSPSKNCQSNCKGGG	45		Antifungal		Predicted	AMP	-0.873	AMP	1	-0.728903	0.758073	non-allergen	-0.826234	0.0144773
ISGCock_Contig03_1676	P. Putative uncharacterized protein	Periplaneta americana (American cockroach)	NA	CAMPSQ2259	100	0.85	BLASTP	Crustin 2	MLRVLVLSMLVVAALGHLPRPKPPQPGCNYYCTKPEGPNKGAKYCCGPQFLPLIREEKHNGFCPPPLKDCTRILPPQVCPHDGHCPINQKCCFDTCLDLHTCKPAHFYIN	110		Antimicrobial		Predicted	AMP	-8.721	AMP	1	-0.596315	0.731308	non-allergen	-0.939821	0.00781827
ISGCock_Contig02_0187	P. Putative uncharacterized protein	Periplaneta americana (American cockroach)	NA	CAMPSQ3171	100	1.3	BLASTP	Dermaseptin-LI1	AVWKDFLKNIGKAAGKAVLNSVTDMVNE	28	18644413	Antimicrobial		Predicted	Non-AMP	0.908	AMP	1	-0.448789	0.810311	non-allergen	-0.988087	0.00601115
ISGCock_Contig07_0598	P. Putative uncharacterized protein	Periplaneta americana (American cockroach)	NA	CAMPSQ3601	100	4.8	BLASTP	HbbetaP-1	AANFGPSVFTPEVHETWQKFLNVVVAALGKQYH	33	18538841	Antiparasitic		Experimentally Validated	AMP	-0.599	AMP	0.872	-0.276064	0.898937	non-allergen	-0.918166	0.00879532
ISGCock_Contig05_1409	P. Putative uncharacterized protein	Periplaneta americana (American cockroach)	NA	CAMPSQ2096	100	0.22	BLASTP	Beta-defensin125	SFEPQKCWKNNIGYCRRRCLDTERYILLCRNKLSCCISIIISYEYTRRPPFRVIHLEDITFDYSDMGSFTGSPVSKLSDLVTFDIRRETMTPKTNTPETTMPPSETTTSKTTMPSSKTTTSKTTMPPPSQMALTHN	136		Antibacterial		Predicted	AMP	-1.837	AMP	0.998	-0.224646	0.922468	non-allergen	-0.945528	0.00757921
ISGCock_Contig04_2963	P. Putative uncharacterized protein	Periplaneta americana (American cockroach)	NA	CAMPSQ3573	91.67	0.065	BLASTP	Pp-AMP1	KSCCRSTQARNIYNAPRFAGGSRPLCALGSGCKIVDDKKTPPND	44	15784998	Antibacterial	Gram+ve, Gram-ve	Experimentally Validated	AMP	-8.151	AMP	1	-0.162433	1	non-allergen	-0.962147	0.00692362
ISGCock_Contig09_2524	P. Putative uncharacterized protein	Periplaneta americana (American cockroach)	NA	CAMPSQ2095	100	4.7	BLASTP	Beta-defensin125	SFEPQKCWKNNIGHCRRRCLDTERYILLCRNKLSCCISIIISHEYTRRPAFPVIHLEDITFDYSDVDSFTGSPVSMLNDLITFDTTKFGETITPETNTPETTMPPSETTSSKTTMPPSETATSETMPPPSQTALTHN	137		Antibacterial		Predicted	AMP	-0.383	Non-AMP	1	-0.0550468	0.988074	non-allergen	-0.746458	0.0222451
ISGCock_Contig13_3347	P. Putative uncharacterized protein	Periplaneta americana (American cockroach)	NA	CAMPSQ1701	100	2.7	BLASTP	Hepcidin antimicrobial peptide 2	QMRQTTELQPLHGEESRADIAIPMQKRRKRDINFPICRFCCQCCNKPSCGICCE	54		Antimicrobial		Predicted	AMP	-0.569	Non-AMP	0.524	0.247503	0.934667	non-allergen	-0.880423	0.0107959
ISGCock_Contig15_1395	P. Putative uncharacterized protein	Periplaneta americana (American cockroach)	NA	CAMPSQ4899	100	0.53	BLASTP	Cathepsin G	IIGGRESRPHSRPYMAYLQIQSPAGQSRCGGFLVREDFVLTAAHCWGSNINVTLGAHNIQRRENTQQHITARRAIRHPQYNQRTIQNDIMLLQLSRRVRRNRNVNPVALPRAQEGLRPGTLCTVAGWGRVSMRRGTDTLREVQLRVQRDRQCLRIFGSYDPRRQICVGDRRERKAAFKGDSGGPLLCNNVAHGIVSYGKSSGVPPEVFTRVSSFLPWIRTTMRSFKLLDQMETPL	235	1937776	Antibacterial	Gram-ve	Experimentally Validated	AMP	-0.856	AMP	1	0.369407	0.866309	non-allergen	-1.04549	0.00439512
ISGCock_Contig11_2145	P. Putative uncharacterized protein	Periplaneta americana (American cockroach)	NA	CAMPSQ2345	90	0.71	BLASTP	Antimicrobial peptide	NCVVFVCCLLFTLGLQTDAVPVSPPFLPGMCRMAVPTCNPAKCSIPLLGKRIPDESNCTRQCVCLSVIQYVG	72	20519222	Antimicrobial		Predicted	AMP	-0.722	Non-AMP	0.641	0.766831	0.735171	non-allergen	-0.903041	0.00954867
ISGCock_Contig14_2246	P. Putative uncharacterized protein	Periplaneta americana (American cockroach)	NA	CAMPSQ4883	100	9	BLASTP	Probable Antibacterial peptide polyprotein	MRSPRVIHLACVIAYIVAVEAGDKPVYLPRPTPPRPIHPRLAREVGWELEGQGLSPLSEAELLPEVRERRSPVDKGGYLPRPTPPRPVYRSRRDASLESELSPLSVAEVLPEVRERRSPVDKGGYLPRPTPPRPVYRSRRDASLESELSPLSEAEVLPEVRERRSPVDKGGYLPRPTPPRPVYRSRRVASLESELSPLSEAEVLPEVRERRSPVDKGGYLPRPTPPRPVYRSRRDASLESELSPLSEEEVLPEVRERGSPVDKGGYLPRPTPPRPVYRSRRDASLESELSPLSVAEDLPEVRERRSPVDKGGYLPRPTPPRPVYRSRRDASLESELSPLSEAEVLPEVRERRSPVDKGGYLPRPTPPRPVYRSRRDASLESELSPLSEAEVLPEVRERR…	678	8688805	Antibacterial		Predicted	AMP	-2.518	AMP	0.953	1.01246	0.56139	non-allergen	-0.984196	0.00613998
ISGCock_Contig15_0712	P. Putative uncharacterized protein	Periplaneta americana (American cockroach)	NA	CAMPSQ4982	100	8	BLASTP	Lysozyme C	KIFERCELARTLKRLGLDGYRGISLANWVCLAKWESDYNTQATNYNPGDQSTDYGIFQINSHYWCNNGKTPGAVNACHISCNALLQDNIADAVTCAKRVVRDPQGIRAWVAWRNHCHNRDVSQYVQGCGV	130	8990116	Antibacterial		Predicted	AMP	-1.564	AMP	0.785	1.18962	0.624931	non-allergen	-1.01858	0.00509029
